# Supplementary material
Source: MDPI journal article supplement (https://www.mdpi.com/1911-8074/16/1/53)
Supplement: s1 [file s1]

**Table S1.** Determinants of self-perceived financial literacy.

|                    | 1                  | 2                  | 3                  | 4                  |
|--------------------|--------------------|--------------------|--------------------|--------------------|
| Actual FL          | 0.470 *** (0.004)  | 0.943 *** (0.006)  | 0.460 *** (0.006)  | 0.886 *** (0.006)  |
| Gender             | 0.168 *** (0.009)  | 0.037 *** (0.011)  | 0.177 *** (0.013)  | 0.047 *** (0.013)  |
| Age2               | 0.049 *** (0.015)  | -0.085 *** (0.024) | 0.092 *** (0.022)  | -0.015 (0.029)     |
| Age3               | -0.017 (0.016)     | -0.126 *** (0.023) | -0.003 (0.023)     | -0.061 ** (0.029)  |
| Age4               | -0.010 (0.016)     | -0.143 *** (0.023) | 0.015 (0.024)      | -0.049 * (0.029)   |
| Age5               | 0.006 (0.017)      | -0.107 *** (0.024) | 0.002 (0.024)      | 0.018 (0.029)      |
| Age6               | 0.063 *** (0.017)  | -0.063** (0.025)   | 0.076 *** (0.024)  | 0.025 (0.030)      |
| Ethnicity          | -0.120 *** (0.009) | 0.059 *** (0.013)  | -0.133 *** (0.013) | 0.068 *** (0.016)  |
| Marital status     | -0.007 (0.010)     | 0.027** (0.013)    | -0.003 (0.014)     | 0.018 (0.016)      |
| Number of children | -0.023 *** (0.002) | 0.004 (0.003)      | -0.030 *** (0.003) | 0.003 (0.004)      |
| Education2         | 0.044 ** (0.020)   | 0.148 *** (0.034)  | 0.033 (0.036)      | 0.316 *** (0.054)  |
| Education3         | 0.018 (0.021)      | 0.206 *** (0.033)  | 0.007 (0.036)      | 0.358 *** (0.053)  |
| Education4         | 0.033 (0.022)      | 0.258 *** (0.034)  | -0.008 (0.037)     | 0.431 *** (0.053)  |
| Education5         | 0.082 *** (0.025)  | 0.245 *** (0.036)  | 0.053 (0.041)      | 0.419 *** (0.055)  |
| Income2            | 0.013 (0.016)      | 0.066 *** (0.023)  | 0.002 (0.024)      | 0.063 ** (0.030)   |
| Income3            | 0.007 (0.016)      | 0.109 *** (0.023)  | 0.020 (0.024)      | 0.083 *** (0.031)  |
| Income4            | 0.013 (0.016)      | 0.120 *** (0.023)  | 0.010 (0.024)      | 0.129 *** (0.029)  |
| Income5            | 0.032 * (0.016)    | 0.164 *** (0.023)  | 0.039 (0.024)      | 0.159 *** (0.029)  |
| Income6            | 0.132 *** (0.019)  | 0.194 *** (0.025)  | 0.159 *** (0.027)  | 0.204 *** (0.031)  |
| Income7            | 0.093 *** (0.021)  | 0.249 *** (0.026)  | 0.109 *** (0.030)  | 0.243 *** (0.032)  |
| Income8            | 0.176 *** (0.025)  | 0.272 *** (0.031)  | 0.149 *** (0.037)  | 0.251 *** (0.036)  |
| Employment         | 0.074 *** (0.011)  | 0.050 *** (0.015)  | 0.104 *** (0.016)  | 0.081 *** (0.019)  |
| Home ownership     | 0.161 *** (0.010)  | 0.113 *** (0.013)  | 0.164 *** (0.014)  | 0.112 *** (0.016)  |
| Disabled           | -0.006 (0.018)     | 0.018 (0.023)      | 0.004 (0.027)      | 0.034 (0.030)      |
| Year2012           | 0.102 *** (0.012)  | 0.048 *** (0.014)  |                    |                    |
| Year2015           | 0.134 *** (0.012)  | 0.099 *** (0.015)  |                    |                    |
| Year2018           | 0.130 *** (0.012)  | 0.037 *** (0.015)  | -0.001 (0.012)     | -0.074 *** (0.013) |
| Constant           | 4.626 *** (0.027)  | -0.628 *** (0.042) | 4.782 *** (0.043)  | -0.588 *** (0.062) |
| Sample size        | 37,091             | 15,369             | 18,658             | 10,771             |
| R-sq               | 0.371              | 0.724              | 0.360              | 0.741              |
| Adj R-sq           | 0.371              | 0.724              | 0.359              | 0.741              |

Standard errors in parentheses. \*  $p < 10\%$ ; \*\*  $p < 5\%$ ; \*\*\*  $p < 1\%$ .**Table S2.** Factors that determine risk preference.

|                  | 1                    | 2                     | 3                    | 4                    | 5                     | 6                    |
|------------------|----------------------|-----------------------|----------------------|----------------------|-----------------------|----------------------|
| Actual FL        | 0.075 ***<br>(0.006) | -0.168 ***<br>(0.014) | 0.150 ***<br>(0.033) | 0.056 ***<br>(0.007) | -0.121 ***<br>(0.020) | 0.143 ***<br>(0.033) |
| Self-assessed FL | 0.461 ***<br>(0.006) | 0.676 ***<br>(0.016)  | 0.337 ***<br>(0.027) | 0.527 ***<br>(0.009) | 0.738 ***<br>(0.023)  | 0.391 ***<br>(0.030) |

|                    |                       |                       |                       |                       |                       |                       |
|--------------------|-----------------------|-----------------------|-----------------------|-----------------------|-----------------------|-----------------------|
| Gender             | 0.900 ***<br>(0.015)  | 1.042 ***<br>(0.028)  | 0.660 ***<br>(0.037)  | 0.913 ***<br>(0.022)  | 1.107 ***<br>(0.039)  | 0.712 ***<br>(0.043)  |
| Age2               | -0.230 ***<br>(0.030) | -0.223 ***<br>(0.047) | -0.162**<br>(0.080)   | -0.128 ***<br>(0.042) | -0.044<br>(0.067)     | -0.081<br>(0.093)     |
| Age3               | -0.556 ***<br>(0.031) | -0.672 ***<br>(0.049) | -0.247 ***<br>(0.079) | -0.480 ***<br>(0.043) | -0.553 ***<br>(0.071) | -0.102<br>(0.094)     |
| Age4               | -0.904 ***<br>(0.031) | -1.146 ***<br>(0.050) | -0.511 ***<br>(0.077) | -0.873 ***<br>(0.043) | -1.131 ***<br>(0.073) | -0.422 ***<br>(0.092) |
| Age5               | -1.351 ***<br>(0.031) | -1.629 ***<br>(0.052) | -0.962 ***<br>(0.080) | -1.344 ***<br>(0.044) | -1.670 ***<br>(0.074) | -0.820 ***<br>(0.093) |
| Age6               | -1.893 ***<br>(0.032) | -2.345 ***<br>(0.053) | -1.370 ***<br>(0.084) | -1.949 ***<br>(0.044) | -2.449 ***<br>(0.075) | -1.353 ***<br>(0.094) |
| Ethnicity          | -0.346 ***<br>(0.018) | -0.406 ***<br>(0.029) | -0.218 ***<br>(0.044) | -0.381 ***<br>(0.024) | -0.408 ***<br>(0.041) | -0.247 ***<br>(0.050) |
| Marital status     | -0.233 ***<br>(0.018) | -0.176 ***<br>(0.030) | -0.291 ***<br>(0.044) | -0.197 ***<br>(0.025) | -0.129 ***<br>(0.043) | -0.263 ***<br>(0.050) |
| Number of children | -0.032 ***<br>(0.004) | -0.054 ***<br>(0.007) | -0.010<br>(0.011)     | -0.041 ***<br>(0.006) | -0.078 ***<br>(0.010) | 0.007<br>(0.012)      |
| Education2         | -0.103 **<br>(0.044)  | -0.025<br>(0.064)     | 0.217 *<br>(0.114)    | -0.269 ***<br>(0.074) | -0.068<br>(0.111)     | -0.513 ***<br>(0.171) |
| Education3         | -0.023<br>(0.044)     | 0.036<br>(0.064)      | -0.138<br>(0.112)     | -0.231 ***<br>(0.074) | -0.019<br>(-0.112)    | -0.570 ***<br>(0.170) |
| Education4         | 0.112 **<br>(0.045)   | 0.153 **<br>(0.067)   | -0.017<br>(0.115)     | -0.113<br>(0.074)     | 0.054<br>(0.113)      | -0.445 ***<br>(0.170) |
| Education5         | 0.250 ***<br>(0.048)  | 0.487 ***<br>(0.078)  | 0.034<br>(0.121)      | -0.033<br>(0.079)     | 0.323 **<br>(0.127)   | -0.481 ***<br>(0.176) |
| Income2            | 0.042<br>(0.032)      | 0.022<br>(0.050)      | -0.018<br>(0.078)     | 0.009<br>(0.046)      | -0.021<br>(0.074)     | 0.066<br>(0.097)      |
| Income3            | 0.197 ***<br>(0.032)  | 0.178 ***<br>(0.051)  | 0.158 **<br>(0.079)   | 0.207 ***<br>(0.046)  | 0.187**<br>(0.075)    | 0.288 ***<br>(0.099)  |
| Income4            | 0.377 ***<br>(0.031)  | 0.341 ***<br>(0.051)  | 0.368 ***<br>(0.076)  | 0.367 ***<br>(0.045)  | 0.348 ***<br>(0.073)  | 0.342 ***<br>(0.094)  |
| Income5            | 0.658 ***<br>(0.031)  | 0.571 ***<br>(0.051)  | 0.642 ***<br>(0.077)  | 0.619 ***<br>(0.044)  | 0.486 ***<br>(0.074)  | 0.640 ***<br>(0.092)  |
| Income6            | 1.035 ***<br>(0.035)  | 1.031 ***<br>(0.059)  | 0.904 ***<br>(0.086)  | 1.005 ***<br>(0.049)  | 0.952 ***<br>(0.083)  | 0.935 ***<br>(0.101)  |
| Income7            | 1.238 ***<br>(0.037)  | 1.177 ***<br>(0.064)  | 1.157 ***<br>(0.090)  | 1.150 ***<br>(0.051)  | 1.009 ***<br>(0.091)  | 1.185 ***<br>(0.102)  |
| Income8            | 1.504 ***<br>(0.042)  | 1.487 ***<br>(0.078)  | 1.515 ***<br>(0.104)  | 1.370 ***<br>(0.060)  | 1.138 ***<br>(0.114)  | 1.501 ***<br>(0.116)  |
| Employment         | 0.241 ***<br>(0.020)  | 0.226 ***<br>(0.034)  | 0.286 ***<br>(0.050)  | 0.259 ***<br>(0.030)  | 0.257 ***<br>(0.050)  | 0.233 ***<br>(0.062)  |
| Home ownership     | 0.196 ***<br>(0.018)  | 0.292 ***<br>(0.031)  | 0.050<br>(0.045)      | 0.279 ***<br>(0.025)  | 0.408 ***<br>(0.044)  | 0.150 ***<br>(0.052)  |
| Disabled           | -0.438 ***<br>(0.034) | -0.498 ***<br>(0.057) | -0.350 ***<br>(0.078) | -0.486 ***<br>(0.048) | -0.589 ***<br>(0.082) | -0.487 ***<br>(0.096) |
| Year2012           | 0.330 ***<br>(0.021)  | 0.463 ***<br>(0.039)  | 0.182 ***<br>(0.049)  |                       |                       |                       |
| Year2015           | 0.639 ***<br>(0.021)  | 0.905 ***<br>(0.038)  | 0.387 ***<br>(0.050)  |                       |                       |                       |
| Year2018           | 0.498 ***<br>(0.021)  | 0.661 ***<br>(0.038)  | 0.318 ***<br>(0.050)  | -0.131 ***<br>(0.021) | -0.237 ***<br>(0.037) | -0.068 *<br>(0.041)   |

|             |                      |                      |                      |                      |                      |                      |
|-------------|----------------------|----------------------|----------------------|----------------------|----------------------|----------------------|
| Constant    | 1.934 ***<br>(0.059) | 1.128 ***<br>(0.112) | 2.251 ***<br>(0.143) | 2.461 ***<br>(0.092) | 1.661 ***<br>(0.172) | 2.588 ***<br>(0.199) |
| Sample size | 93,227               | 37,091               | 15,369               | 47,091               | 18,658               | 10,771               |
| R-sq        | 0.229                | 0.256                | 0.186                | 0.245                | 0.287                | 0.221                |
| Adj R-sq    | 0.229                | 0.256                | 0.185                | 0.245                | 0.286                | 0.219                |

Standard errors in parentheses. \*  $p < 10\%$ ; \*\*  $p < 5\%$ ; \*\*\*  $p < 1\%$ .

**Table S3.** Determinants of self-perceived financial literacy (additional control variables are in italics).

|                    | 1                     | 2                     | 3                     | 4                     |
|--------------------|-----------------------|-----------------------|-----------------------|-----------------------|
| Actual FL          | 0.476 ***<br>(0.004)  | 0.941 ***<br>(0.006)  | 0.468 ***<br>(0.006)  | 0.876 ***<br>(0.007)  |
| Gender             | 0.161 ***<br>(0.009)  | 0.045 ***<br>(0.011)  | 0.165 ***<br>(0.013)  | 0.057 ***<br>(0.014)  |
| Age2               | 0.011<br>(0.016)      | -0.120 ***<br>(0.026) | 0.049 **<br>(0.023)   | -0.049<br>(0.032)     |
| Age3               | -0.057 ***<br>(0.017) | -0.165 ***<br>(0.026) | -0.046*<br>(0.025)    | -0.099 ***<br>(0.033) |
| Age4               | -0.064 ***<br>(0.017) | -0.188 ***<br>(0.026) | -0.039<br>(0.025)     | -0.090 ***<br>(0.032) |
| Age5               | -0.043 **<br>(0.018)  | -0.158 ***<br>(0.027) | -0.044 *<br>(0.026)   | -0.025<br>(0.033)     |
| Age6               | 0.011<br>(0.019)      | -0.114 ***<br>(0.028) | 0.022<br>(0.026)      | -0.015<br>(0.033)     |
| Ethnicity          | -0.127 ***<br>(0.010) | 0.046 ***<br>(0.013)  | -0.136 ***<br>(0.014) | 0.062 ***<br>(0.016)  |
| Marital status     | 0.090 ***<br>(0.014)  | 0.031<br>(0.021)      | 0.088 ***<br>(0.020)  | 0.005<br>(0.025)      |
| Number of children | -0.022 ***<br>(0.002) | 0.005<br>(0.003)      | -0.028 ***<br>(0.004) | 0.004<br>(0.004)      |
| Education2         | 0.02<br>(0.022)       | 0.151 ***<br>(0.035)  | 0.018<br>(0.038)      | 0.294 ***<br>(0.055)  |
| Education3         | -0.015<br>(0.022)     | 0.200 ***<br>(0.035)  | -0.027<br>(0.038)     | 0.332 ***<br>(0.055)  |
| Education4         | -0.012<br>(0.023)     | 0.253 ***<br>(0.036)  | -0.045<br>(0.039)     | 0.405 ***<br>(0.055)  |
| Education5         | 0.026<br>(0.026)      | 0.236 ***<br>(0.037)  | 0.003<br>(0.043)      | 0.389 ***<br>(0.057)  |
| Income2            | 0.021<br>(0.017)      | 0.056 **<br>(0.024)   | 0.001<br>(0.025)      | 0.038<br>(0.031)      |
| Income3            | 0.017<br>(0.017)      | 0.088 ***<br>(0.025)  | 0.022<br>(0.025)      | 0.053 *<br>(0.032)    |
| Income4            | 0.032*<br>(0.017)     | 0.087 ***<br>(0.024)  | 0.015<br>(0.025)      | 0.080 ***<br>(0.031)  |
| Income5            | 0.046 ***<br>(0.018)  | 0.139 ***<br>(0.025)  | 0.042<br>(0.026)      | 0.110 ***<br>(0.031)  |
| Income6            | 0.146 ***<br>(0.020)  | 0.160 ***<br>(0.028)  | 0.158 ***<br>(0.029)  | 0.147 ***<br>(0.034)  |
| Income7            | 0.108 ***<br>(0.022)  | 0.219 ***<br>(0.029)  | 0.108 ***<br>(0.031)  | 0.192 ***<br>(0.034)  |
| Income8            | 0.201 ***<br>(0.026)  | 0.236 ***<br>(0.033)  | 0.169 ***<br>(0.038)  | 0.194 ***<br>(0.038)  |

|                           |                       |                       |                       |                       |
|---------------------------|-----------------------|-----------------------|-----------------------|-----------------------|
| Employment                | 0.055 ***<br>(0.011)  | 0.039**<br>(0.015)    | 0.078 ***<br>(0.017)  | 0.072 ***<br>(0.020)  |
| Home ownership            | 0.153 ***<br>(0.010)  | 0.112 ***<br>(0.014)  | 0.153 ***<br>(0.015)  | 0.112 ***<br>(0.016)  |
| Disabled                  | 0.002<br>(0.019)      | 0.012<br>(0.024)      | 0.008<br>(0.027)      | 0.026<br>(0.031)      |
| <i>Health insurance</i>   | -0.003<br>(0.013)     | 0.042**<br>(0.017)    | -0.011<br>(0.020)     | 0.068 ***<br>(0.026)  |
| <i>Retirement benefit</i> | 0.019 *<br>(0.010)    | 0.028*<br>(0.014)     | 0.032**<br>(0.015)    | 0.047 ***<br>(0.017)  |
| <i>Living2</i>            | -0.198 ***<br>(0.015) | -0.013<br>(0.023)     | -0.198 ***<br>(0.021) | 0.006<br>(0.027)      |
| <i>Living3</i>            | -0.195 ***<br>(0.019) | -0.099 ***<br>(0.027) | -0.205 ***<br>(0.027) | -0.096 ***<br>(0.033) |
| <i>Living4</i>            | -0.140 ***<br>(0.017) | -0.016<br>(0.022)     | -0.147 ***<br>(0.023) | 0.006<br>(0.026)      |
| Year2012                  | 0.106 ***<br>(0.013)  | 0.055 ***<br>(0.015)  |                       |                       |
| Year2015                  | 0.135 ***<br>(0.013)  | 0.107 ***<br>(0.016)  |                       |                       |
| Year2018                  | 0.134 ***<br>(0.013)  | 0.049 ***<br>(0.016)  | 0.003<br>(0.012)      | -0.067 ***<br>(0.013) |
| Constant                  | 4.773 ***<br>(0.031)  | -0.585 ***<br>(0.048) | 4.934 ***<br>(0.049)  | -0.544 ***<br>(0.070) |
| Observations              | 34,862                | 15,171                | 17,786                | 10,668                |
| R-sq                      | 0.381                 | 0.724                 | 0.374                 | 0.737                 |
| Adjusted R-sq             | 0.380                 | 0.724                 | 0.373                 | 0.736                 |

Standard errors in parentheses. \*  $p < 0.1$ ; \*\*  $p < 0.05$ ; \*\*\*  $p < 0.01$ .

**Table S4.** Factors that determine risk preference (additional control variables are in italics).

|                  | 1                     | 2                     | 3                     | 4                     | 5                     | 6                     |
|------------------|-----------------------|-----------------------|-----------------------|-----------------------|-----------------------|-----------------------|
| Actual FL        | 0.073 ***<br>(0.006)  | -0.163 ***<br>(0.015) | 0.168 ***<br>(0.034)  | 0.065 ***<br>(0.007)  | -0.108 ***<br>(0.021) | 0.163 ***<br>(0.034)  |
| Self-assessed FL | 0.460 ***<br>(0.006)  | 0.667 ***<br>(0.017)  | 0.322 ***<br>(0.028)  | 0.515 ***<br>(0.009)  | 0.704 ***<br>(0.024)  | 0.388 ***<br>(0.030)  |
| Gender           | 0.909 ***<br>(0.016)  | 1.051 ***<br>(0.029)  | 0.686 ***<br>(0.039)  | 0.901 ***<br>(0.022)  | 1.082 ***<br>(0.041)  | 0.720 ***<br>(0.043)  |
| Age2             | -0.317 ***<br>(0.033) | -0.306 ***<br>(0.051) | -0.308 ***<br>(0.087) | -0.239 ***<br>(0.046) | -0.176 **<br>(0.073)  | -0.261 **<br>(0.103)  |
| Age3             | -0.651 ***<br>(0.034) | -0.763 ***<br>(0.054) | -0.376 ***<br>(0.087) | -0.604 ***<br>(0.047) | -0.685 ***<br>(0.076) | -0.310 ***<br>(0.105) |
| Age4             | -0.993 ***<br>(0.034) | -1.225 ***<br>(0.055) | -0.651 ***<br>(0.087) | -1.005 ***<br>(0.047) | -1.283 ***<br>(0.079) | -0.633 ***<br>(0.103) |
| Age5             | -1.421 ***<br>(0.035) | -1.697 ***<br>(0.057) | -1.093 ***<br>(0.090) | -1.454 ***<br>(0.048) | -1.798 ***<br>(0.080) | -1.005 ***<br>(0.104) |
| Age6             | -1.973 ***<br>(0.036) | -2.420 ***<br>(0.060) | -1.513 ***<br>(0.096) | -2.032 ***<br>(0.048) | -2.550 ***<br>(0.082) | -1.525 ***<br>(0.106) |
| Ethnicity        | -0.345 ***<br>(0.018) | -0.403 ***<br>(0.030) | -0.218 ***<br>(0.045) | -0.384 ***<br>(0.025) | -0.425 ***<br>(0.042) | -0.252 ***<br>(0.051) |
| Marital status   | -0.015<br>(0.028)     | 0.136 ***<br>(0.045)  | -0.301 ***<br>(0.071) | 0.129 ***<br>(0.038)  | 0.319 ***<br>(0.063)  | -0.173 **<br>(0.081)  |

|                    |                       |                       |                       |                       |                       |                       |
|--------------------|-----------------------|-----------------------|-----------------------|-----------------------|-----------------------|-----------------------|
| Number of children | -0.033 ***<br>(0.004) | -0.058 ***<br>(0.008) | -0.007<br>(0.011)     | -0.042 ***<br>(0.006) | -0.079 ***<br>(0.011) | 0.006<br>(0.012)      |
| Education2         | -0.141 ***<br>(0.046) | -0.06<br>(0.069)      | -0.175<br>(0.119)     | -0.264 ***<br>(0.078) | -0.082<br>(0.117)     | -0.408 **<br>(0.176)  |
| Education3         | -0.061<br>(0.046)     | 0.003<br>(0.069)      | -0.126<br>(0.118)     | -0.222 ***<br>(0.078) | -0.027<br>(0.119)     | -0.486 ***<br>(0.174) |
| Education4         | 0.043<br>(0.048)      | 0.087<br>(0.072)      | -0.009<br>(0.120)     | -0.140 *<br>(0.078)   | -0.005<br>(0.120)     | -0.371 **<br>(0.175)  |
| Education5         | 0.146 ***<br>(0.051)  | 0.373 ***<br>(0.083)  | 0.012<br>(0.126)      | -0.086<br>(0.083)     | 0.246 *<br>(0.134)    | -0.437 **<br>(0.180)  |
| Income2            | 0.017<br>(0.034)      | -0.006<br>(0.054)     | -0.1<br>(0.082)       | 0.011<br>(0.047)      | -0.012<br>(0.078)     | 0.006<br>(0.100)      |
| Income3            | 0.159 ***<br>(0.035)  | 0.136 **<br>(0.055)   | 0.068<br>(0.084)      | 0.203 ***<br>(0.048)  | 0.169 **<br>(0.079)   | 0.244 **<br>(0.102)   |
| Income4            | 0.327 ***<br>(0.034)  | 0.314 ***<br>(0.055)  | 0.187 **<br>(0.082)   | 0.357 ***<br>(0.047)  | 0.356 ***<br>(0.078)  | 0.247 **<br>(0.099)   |
| Income5            | 0.581 ***<br>(0.034)  | 0.504 ***<br>(0.056)  | 0.451 ***<br>(0.084)  | 0.593 ***<br>(0.047)  | 0.449 ***<br>(0.080)  | 0.554 ***<br>(0.098)  |
| Income6            | 0.956 ***<br>(0.038)  | 0.955 ***<br>(0.064)  | 0.684 ***<br>(0.093)  | 0.979 ***<br>(0.052)  | 0.908 ***<br>(0.089)  | 0.853 ***<br>(0.107)  |
| Income7            | 1.160 ***<br>(0.040)  | 1.108 ***<br>(0.070)  | 0.937 ***<br>(0.097)  | 1.136 ***<br>(0.055)  | 0.983 ***<br>(0.098)  | 1.100 ***<br>(0.109)  |
| Income8            | 1.435 ***<br>(0.045)  | 1.428 ***<br>(0.083)  | 1.301 ***<br>(0.111)  | 1.359 ***<br>(0.063)  | 1.141 ***<br>(0.120)  | 1.406 ***<br>(0.123)  |
| Employment         | 0.206 ***<br>(0.021)  | 0.177 ***<br>(0.036)  | 0.246 ***<br>(0.052)  | 0.204 ***<br>(0.031)  | 0.183 ***<br>(0.053)  | 0.167 ***<br>(0.064)  |
| Home ownership     | 0.163 ***<br>(0.019)  | 0.254 ***<br>(0.033)  | 0.014<br>(0.047)      | 0.249 ***<br>(0.026)  | 0.382 ***<br>(0.046)  | 0.134 **<br>(0.053)   |
| Disabled           | -0.381 ***<br>(0.035) | -0.423 ***<br>(0.059) | -0.335 ***<br>(0.081) | -0.394 ***<br>(0.049) | -0.468 ***<br>(0.085) | -0.418 ***<br>(0.097) |
| Health insurance   | -0.083 ***<br>(0.024) | -0.070 *<br>(0.040)   | 0.041<br>(0.059)      | -0.207 ***<br>(0.038) | -0.174 ***<br>(0.062) | -0.256 ***<br>(0.081) |
| Retirement benefit | 0.323 ***<br>(0.019)  | 0.354 ***<br>(0.033)  | 0.328 ***<br>(0.048)  | 0.324 ***<br>(0.026)  | 0.394 ***<br>(0.046)  | 0.252 ***<br>(0.054)  |
| Living2            | -0.382 ***<br>(0.030) | -0.569 ***<br>(0.047) | -0.046<br>(0.077)     | -0.543 ***<br>(0.040) | -0.781 ***<br>(0.064) | -0.225 ***<br>(0.087) |
| Living3            | -0.179 ***<br>(0.038) | -0.234 ***<br>(0.061) | -0.223**<br>(0.090)   | -0.223 ***<br>(0.051) | -0.348 ***<br>(0.085) | -0.378 ***<br>(0.106) |
| Living4            | -0.181 ***<br>(0.031) | -0.243 ***<br>(0.052) | -0.066<br>(0.073)     | -0.255 ***<br>(0.042) | -0.328 ***<br>(0.072) | -0.265 ***<br>(0.083) |
| Year2012           | 0.322 ***<br>(0.023)  | 0.449 ***<br>(0.042)  | 0.185 ***<br>(0.052)  |                       |                       |                       |
| Year2015           | 0.625 ***<br>(0.022)  | 0.882 ***<br>(0.042)  | 0.373 ***<br>(0.053)  |                       |                       |                       |
| Year2018           | 0.490 ***<br>(0.023)  | 0.637 ***<br>(0.042)  | 0.317 ***<br>(0.053)  | -0.123 ***<br>(0.021) | -0.242 ***<br>(0.038) | -0.061<br>(0.041)     |
| Constant           | 2.199 ***<br>(0.068)  | 1.489 ***<br>(0.128)  | 2.348 ***<br>(0.164)  | 2.850 ***<br>(0.105)  | 2.274 ***<br>(0.194)  | 2.968 ***<br>(0.225)  |
| Observations       | 90,115                | 34,862                | 15,171                | 45,764                | 17,786                | 10,668                |
| R-sq               | 0.23                  | 0.256                 | 0.19                  | 0.253                 | 0.3                   | 0.229                 |
| Adjusted R-sq      | 0.23                  | 0.255                 | 0.188                 | 0.253                 | 0.299                 | 0.226                 |

Standard errors in parentheses. \*  $p < 10\%$ ; \*\*  $p < 5\%$ ; \*\*\*  $p < 1\%$ .
